# Supplementary material for: The Peopling of Korea Revealed by Analyses of Mitochondrial DNA and Y-Chromosomal Markers
Source: PLoS One. 2009 Jan 16;4(1):e4210. doi: 10.1371/journal.pone.0004210 (PMC2615218; doi:10.1371/journal.pone.0004210)
Supplement: Table S4 — F ST distances of mtDNA haplogroups in east Asian populations (non-significant values are underlined). aPresent work; bKivisild et al. [20]; cYao et al. [19]; dLee et al. [30]; eWen et al. [27]; fKong et al. [25]; gLi et al. [36]. (0.22 MB XLS) [file pone.0004210.s004.xls]

## Sheet: Y-SNPs(false)
Table. FST values (Y haplogroups)
		1	2	3	4	5	6	7	8	9	10	11	12	13	14	15	16	17	18	19	20	21	22	23	24	25	26	27	28	29	30	31
1	BeijingHan_Hong
2	ManchuHan_Hong	0.06624
3	Japanese_Hong	0.15687	0.08751
4	Korean_Hong	0.04707	-0.00752	0.09063
5	Buryats_Hong	0.1876	0.1255	0.16474	0.12418
6	Khalkhs_Hong	0.17232	0.10551	0.16048	0.11486	0.0017
7	YunnanHan_Hong	0.0222	0.01526	0.10687	0.00326	0.11629	0.12024
8	Indonesians_Hong	0.13039	0.02505	0.09014	0.03443	0.20031	0.1813	0.06843
9	Philippines_Hong	0.01453	0.1028	0.20906	0.07463	0.25029	0.22906	0.04474	0.17936
10	Thais_Hong	0.25725	0.14454	0.14425	0.1435	0.29986	0.29312	0.19518	0.02834	0.3313
11	Vietnamese_Hong	0.08698	-0.02003	0.09151	-0.00335	0.13091	0.11198	0.02929	0.01276	0.13149	0.12217
12	Khalkh_Katoh	0.2356	0.16195	0.2222	0.17516	0.05923	0.00599	0.20066	0.26138	0.28753	0.37345	0.17165
13	Uriankhai_Katoh	0.29653	0.20209	0.24093	0.21376	0.0689	0.01625	0.24239	0.27701	0.35051	0.37845	0.20734	0.0083
14	Zakhchin_Katoh	0.23236	0.15759	0.1919	0.17234	0.06502	0.01233	0.18654	0.22292	0.28463	0.32503	0.16485	0.01716	0.00285
15	Khoton_Katoh	0.44973	0.45211	0.41232	0.40552	0.4126	0.36958	0.42535	0.47251	0.48607	0.54126	0.47571	0.40573	0.38379	0.29812
16	Manchu_Katoh	0.07429	-0.01141	0.10252	0.00123	0.16425	0.14211	0.02692	0.01298	0.10463	0.12273	-0.01259	0.19854	0.23463	0.19188	0.43587
17	NorthernHan_Katoh	0.04049	0.08277	0.1804	0.06606	0.1858	0.16079	0.04301	0.17136	0.02764	0.32171	0.10889	0.21528	0.26991	0.19032	0.42306	0.10005
18	KoreanChinese_Katoh	0.15066	0.02564	0.08749	0.04226	0.19696	0.18032	0.08362	-0.01236	0.20364	0.03617	0.01124	0.24708	0.26169	0.2158	0.44948	0.01979	0.18376
19	Korean_Katoh	0.08135	-0.00912	0.06724	0.00202	0.12739	0.10921	0.02555	0.00411	0.12024	0.09585	-0.01161	0.17078	0.19556	0.15114	0.39551	-0.00384	0.09735	0.00769
20	Japanese_Katoh	0.20425	0.12416	-0.00088	0.12714	0.21566	0.21106	0.14985	0.09965	0.25944	0.12949	0.12469	0.27438	0.28596	0.23614	0.43293	0.13256	0.23552	0.09593	0.09337
21	Daur_Xue	0.09432	0.01375	0.09276	0.02293	0.03269	0.01859	0.04375	0.06408	0.15474	0.16897	0.01199	0.07335	0.10027	0.07354	0.42053	0.03686	0.11074	0.06498	0.01768	0.13575
22	Ewenki_Xue	0.21315	0.1287	0.20729	0.14242	0.05345	0.00037	0.17631	0.23007	0.26779	0.36479	0.13577	-0.01006	0.02154	0.03397	0.49969	0.16504	0.19996	0.22167	0.14041	0.26435	0.04153
23	Hezhe_Xue	0.07715	0.04178	0.1557	0.03714	0.049	0.05615	0.02357	0.14937	0.10829	0.29006	0.05599	0.11197	0.16635	0.13815	0.47124	0.07291	0.07825	0.15049	0.06811	0.21418	0.02292	0.08401
24	Hui_Xue	0.09875	0.09211	0.08662	0.09517	0.06133	0.02991	0.08219	0.13787	0.16256	0.2406	0.10564	0.07724	0.0976	0.04424	0.29301	0.12083	0.10755	0.14929	0.08436	0.12726	0.03769	0.07978	0.08795
25	Manchu_Xue	0.06018	0.00431	0.09626	0.00586	0.03854	0.03441	0.00374	0.07999	0.09823	0.21141	0.01307	0.09499	0.13552	0.10193	0.42938	0.02929	0.06685	0.08505	0.01915	0.14637	-0.01028	0.06517	-0.01329	0.04503
26	InnerMongols_Xue	0.15382	0.09159	0.18191	0.1007	0.01594	-0.00638	0.10994	0.19884	0.20714	0.32736	0.10163	0.00915	0.04948	0.0462	0.4397	0.13046	0.14419	0.19167	0.10995	0.23987	0.02011	-0.0059	0.02502	0.05897	0.02166
27	Oroqen_Xue	0.25136	0.14849	0.22152	0.16365	0.05452	0.00843	0.20424	0.25165	0.31195	0.37483	0.15261	-0.00714	0.01392	0.0338	0.50947	0.18635	0.23287	0.23264	0.15739	0.27655	0.05549	-0.02703	0.10497	0.10568	0.08669	0.00351
28	UygurUrumqi_Xue	0.20487	0.23869	0.21681	0.22763	0.18636	0.16701	0.18759	0.24944	0.28088	0.32122	0.25369	0.24246	0.23719	0.15532	0.1762	0.2574	0.21542	0.26338	0.21073	0.24468	0.18313	0.27175	0.24092	0.05748	0.19113	0.22256	0.29334
29	UygurYili_Xue	0.17339	0.19385	0.20751	0.18857	0.157	0.12861	0.14806	0.22158	0.23199	0.31275	0.211	0.19161	0.18901	0.11347	0.14016	0.21415	0.16249	0.234	0.17476	0.2408	0.15005	0.22054	0.1906	0.04227	0.14784	0.17293	0.24182	-0.01343
30	Xibe_Xue	0.07506	0.0632	0.12329	0.05861	0.01036	0.00583	0.04144	0.13443	0.12962	0.25154	0.07491	0.06393	0.09696	0.06337	0.36626	0.09434	0.08595	0.14496	0.07005	0.17564	0.00459	0.04981	0.01292	0.00732	-0.00213	0.01019	0.07283	0.12154	0.0918
31	HarbinHan_Xue	0.02177	0.0564	0.19405	0.04206	0.2011	0.19024	0.02167	0.16891	0.01722	0.33099	0.08178	0.24552	0.32093	0.26318	0.55783	0.06972	0.04344	0.17571	0.09074	0.25071	0.10988	0.2247	0.04331	0.16174	0.05005	0.14928	0.26156	0.31197	0.25586	0.10219
32	YiliHan_Xue	0.0121	0.03522	0.11963	0.02703	0.16109	0.1333	0.00033	0.08099	0.01481	0.22369	0.056	0.20162	0.24377	0.17309	0.37504	0.04155	0.01646	0.10608	0.04093	0.16127	0.07045	0.1821	0.06777	0.06035	0.03399	0.13211	0.22144	0.15316	0.10855	0.05743	0.03674
33	KoreanChinese_Xue	0.04195	-0.01908	0.08079	-0.01224	0.13323	0.12015	-0.00172	0.00039	0.09635	0.10208	-0.01907	0.19528	0.23269	0.17513	0.46525	-0.01631	0.08554	0.00642	-0.01591	0.11154	0.01736	0.16747	0.05605	0.08036	0.01136	0.11636	0.19046	0.19724	0.16233	0.05919	0.06218
34	Buyi_Xue	0.17487	0.0662	0.11737	0.06418	0.23606	0.24179	0.09184	-0.00417	0.233	0.01849	0.04993	0.33333	0.34926	0.29544	0.54001	0.0513	0.22944	0.00771	0.03904	0.12137	0.11093	0.31288	0.18734	0.20318	0.12191	0.26006	0.32753	0.30183	0.27944	0.1828	0.21487
35	Hani_Xue	0.19234	0.0527	0.09691	0.06607	0.14881	0.14861	0.10578	0.00821	0.26672	0.02916	0.03155	0.23266	0.23378	0.1963	0.49252	0.05423	0.23298	0.00313	0.02721	0.10573	0.04644	0.20629	0.15008	0.14179	0.08324	0.17402	0.21115	0.25401	0.23339	0.12591	0.23053
36	Li_Xue	0.32196	0.22168	0.18782	0.20688	0.33613	0.32301	0.27023	0.08903	0.38786	0.03777	0.20043	0.40828	0.40482	0.34864	0.58679	0.19692	0.37417	0.11234	0.15906	0.17362	0.21332	0.3968	0.35292	0.2725	0.26989	0.37366	0.41282	0.36228	0.35971	0.29075	0.41495
37	Qing_Xue	0.02495	0.05512	0.04672	0.04091	0.16119	0.14639	0.02581	0.07269	0.06393	0.1773	0.07079	0.22548	0.26524	0.19423	0.41597	0.06269	0.0721	0.09779	0.04686	0.07733	0.07167	0.19989	0.10149	0.04409	0.05302	0.15829	0.23808	0.14901	0.13535	0.06482	0.08833
38	She_Xue	0.03995	0.12288	0.23986	0.08906	0.30228	0.28706	0.07138	0.21439	0.00037	0.3778	0.15316	0.34512	0.41911	0.35269	0.61715	0.11834	0.07543	0.22942	0.1449	0.292	0.19555	0.33637	0.13608	0.23268	0.13329	0.2586	0.37964	0.37679	0.32338	0.18404	0.00823
39	Tibetans_Xue	0.13555	0.16356	0.07429	0.14237	0.20595	0.21187	0.10758	0.22893	0.16724	0.34038	0.19221	0.27936	0.32474	0.25409	0.47642	0.1871	0.14269	0.23207	0.15782	0.11327	0.17636	0.28429	0.16085	0.10653	0.12959	0.22143	0.31223	0.22244	0.2032	0.1359	0.17257
40	YaoBama_Xue	0.10227	-0.0105	0.0702	0.00401	0.14504	0.12976	0.03844	-0.01251	0.15362	0.07274	-0.0196	0.2007	0.2274	0.18225	0.48105	-0.00953	0.13798	-0.00966	-0.01457	0.09267	0.02127	0.16506	0.08551	0.10854	0.02985	0.13244	0.18326	0.24784	0.21353	0.08962	0.11546
41	YaoLiannan_Xue	0.08402	0.17007	0.28919	0.12736	0.36091	0.34958	0.11624	0.28604	0.04137	0.44541	0.20646	0.39495	0.47625	0.40941	0.67986	0.15997	0.11687	0.27973	0.19202	0.34141	0.26096	0.41585	0.18124	0.3041	0.191	0.31584	0.45014	0.44797	0.3863	0.24811	0.02567
42	ChengduHan_Xue	0.01182	0.01579	0.13122	0.00512	0.16715	0.14911	0.00244	0.07362	0.01429	0.22349	0.02986	0.21838	0.27501	0.21876	0.50239	0.0201	0.04492	0.09825	0.03383	0.17844	0.0563	0.17726	0.04487	0.11077	0.02168	0.13018	0.21893	0.25871	0.21499	0.07022	0.0044
43	LanzhouHan_Xue	0.01873	0.03172	0.09494	0.02585	0.05982	0.04216	0.01046	0.10989	0.06219	0.24271	0.04921	0.09757	0.14878	0.09312	0.39339	0.05795	0.02936	0.12166	0.04348	0.14847	0.01115	0.07874	0.01067	0.00482	-0.00808	0.035	0.11014	0.12954	0.09553	-0.01188	0.04596
44	Meizian_Xue	0.00982	0.03652	0.13825	0.01966	0.17403	0.15423	0.00937	0.08571	0.00479	0.23464	0.05295	0.22736	0.28057	0.22099	0.48334	0.03929	0.04122	0.11745	0.04902	0.1851	0.06909	0.18673	0.0596	0.10461	0.03395	0.14229	0.23262	0.24233	0.20171	0.07077	0.01859
45	Japanese_Xue	0.13832	0.05226	-0.00822	0.0574	0.13765	0.13854	0.07261	0.0541	0.19827	0.11393	0.05325	0.21181	0.23101	0.18136	0.44111	0.06663	0.16834	0.05045	0.03434	0.00219	0.0607	0.19217	0.12297	0.07928	0.063	0.15812	0.20645	0.2098	0.1953	0.09829	0.17128
46	OuterMongolia_Xue	0.24702	0.172	0.21918	0.1835	0.03733	-0.00367	0.20057	0.25334	0.30608	0.35614	0.17864	-0.00357	-0.00722	0.00268	0.37442	0.20831	0.22867	0.24226	0.17226	0.26779	0.07063	0.0074	0.12241	0.06632	0.09929	0.01857	0.00483	0.20238	0.15954	0.05633	0.26971
		32	33	34	35	36	37	38	39	40	41	42	43	44	45	46
1	BeijingHan_Hong
2	ManchuHan_Hong
3	Japanese_Hong
4	Korean_Hong
5	Buryats_Hong
6	Khalkhs_Hong
7	YunnanHan_Hong
8	Indonesians_Hong
9	Philippines_Hong
10	Thais_Hong
11	Vietnamese_Hong
12	Khalkh_Katoh
13	Uriankhai_Katoh
14	Zakhchin_Katoh
15	Khoton_Katoh
16	Manchu_Katoh
17	NorthernHan_Katoh
18	KoreanChinese_Katoh
19	Korean_Katoh
20	Japanese_Katoh
21	Daur_Xue
22	Ewenki_Xue
23	Hezhe_Xue
24	Hui_Xue
25	Manchu_Xue
26	InnerMongols_Xue
27	Oroqen_Xue
28	UygurUrumqi_Xue
29	UygurYili_Xue
30	Xibe_Xue
31	HarbinHan_Xue
32	YiliHan_Xue
33	KoreanChinese_Xue	0.01909
34	Buyi_Xue	0.13899	0.02928
35	Hani_Xue	0.15106	0.03129	0.01207
36	Li_Xue	0.28566	0.19552	0.10388	0.0945
37	Qing_Xue	0.00896	0.0298	0.11764	0.12862	0.22326
38	She_Xue	0.06241	0.12737	0.26555	0.30843	0.45354	0.10878
39	Tibetans_Xue	0.10743	0.15936	0.26512	0.26372	0.40111	0.05294	0.2184
40	YaoBama_Xue	0.06537	-0.01942	0.01567	0.00526	0.1474	0.06126	0.17972	0.19153
41	YaoLiannan_Xue	0.11962	0.18758	0.33398	0.37834	0.54067	0.18126	-0.00668	0.2735	0.24319
42	ChengduHan_Xue	0.00529	0.01291	0.12226	0.14029	0.28168	0.02898	0.02285	0.15206	0.04316	0.0811
43	LanzhouHan_Xue	0.00909	0.02708	0.16618	0.13194	0.29395	0.01724	0.11424	0.08916	0.06644	0.17765	0.02303
44	Meizian_Xue	-0.00018	0.02982	0.13824	0.1584	0.28006	0.0211	0.023	0.1473	0.06304	0.09025	-0.02519	0.02393
45	Japanese_Xue	0.09799	0.04181	0.07445	0.05385	0.17443	0.03925	0.23154	0.08584	0.03197	0.29029	0.10466	0.07557	0.11585
46	OuterMongolia_Xue	0.20621	0.19465	0.32012	0.21236	0.38648	0.22462	0.36913	0.28303	0.20035	0.42429	0.23262	0.1037	0.23853	0.20504

## Sheet: Y-SNPs P(false)
	1	2	3	4	5	6	7	8	9	10	11	12	13	14	15	16	17	18	19	20	21	22	23	24	25	26	27	28	29	30	31	32	33	34	35	36	37	38	39	40	41	42	43	44	45	46
1		+	+	+	+	+	-	+	-	+	+	+	+	+	+	+	+	+	+	+	+	+	+	+	+	+	+	+	+	+	-	-	-	+	+	+	-	+	+	+	+	-	-	-	+	+
2	+		+	-	+	+	-	-	+	+	-	+	+	+	+	-	+	-	-	+	-	+	+	+	-	+	+	+	+	+	+	-	-	+	+	+	+	+	+	-	+	-	-	-	+	+
3	+	+		+	+	+	+	+	+	+	+	+	+	+	+	+	+	+	+	-	+	+	+	+	+	+	+	+	+	+	+	+	+	+	+	+	+	+	+	+	+	+	+	+	-	+
4	+	-	+		+	+	-	+	+	+	-	+	+	+	+	-	+	+	-	+	+	+	+	+	-	+	+	+	+	+	+	-	-	+	+	+	+	+	+	-	+	-	-	-	+	+
5	+	+	+	+		-	+	+	+	+	+	+	+	+	+	+	+	+	+	+	-	+	+	+	+	-	+	+	+	-	+	+	+	+	+	+	+	+	+	+	+	+	+	+	+	+
6	+	+	+	+	-		+	+	+	+	+	-	-	-	+	+	+	+	+	+	-	-	+	-	-	-	-	+	+	-	+	+	+	+	+	+	+	+	+	+	+	+	+	+	+	-
7	-	-	+	-	+	+		+	+	+	-	+	+	+	+	+	+	+	-	+	+	+	-	+	-	+	+	+	+	+	-	-	-	+	+	+	-	+	+	+	+	-	-	-	+	+
8	+	-	+	+	+	+	+		+	-	-	+	+	+	+	-	+	-	-	+	+	+	+	+	+	+	+	+	+	+	+	+	-	-	-	+	+	+	+	-	+	+	+	+	+	+
9	-	+	+	+	+	+	+	+		+	+	+	+	+	+	+	+	+	+	+	+	+	+	+	+	+	+	+	+	+	-	-	+	+	+	+	+	-	+	+	+	-	+	-	+	+
10	+	+	+	+	+	+	+	-	+		+	+	+	+	+	+	+	+	+	+	+	+	+	+	+	+	+	+	+	+	+	+	+	-	+	+	+	+	+	+	+	+	+	+	+	+
11	+	-	+	-	+	+	-	-	+	+		+	+	+	+	-	+	-	-	+	-	+	+	+	-	+	+	+	+	+	+	+	-	+	-	+	+	+	+	-	+	-	+	+	+	+
12	+	+	+	+	+	-	+	+	+	+	+		-	-	+	+	+	+	+	+	+	-	+	+	+	-	-	+	+	+	+	+	+	+	+	+	+	+	+	+	+	+	+	+	+	-
13	+	+	+	+	+	-	+	+	+	+	+	-		-	+	+	+	+	+	+	+	-	+	+	+	+	-	+	+	+	+	+	+	+	+	+	+	+	+	+	+	+	+	+	+	-
14	+	+	+	+	+	-	+	+	+	+	+	-	-		+	+	+	+	+	+	+	+	+	+	+	+	+	+	+	+	+	+	+	+	+	+	+	+	+	+	+	+	+	+	+	-
15	+	+	+	+	+	+	+	+	+	+	+	+	+	+		+	+	+	+	+	+	+	+	+	+	+	+	+	+	+	+	+	+	+	+	+	+	+	+	+	+	+	+	+	+	+
16	+	-	+	-	+	+	+	-	+	+	-	+	+	+	+		+	-	-	+	+	+	+	+	-	+	+	+	+	+	+	+	-	+	+	+	+	+	+	-	+	-	+	+	+	+
17	+	+	+	+	+	+	+	+	+	+	+	+	+	+	+	+		+	+	+	+	+	+	+	+	+	+	+	+	+	+	-	+	+	+	+	+	+	+	+	+	+	+	+	+	+
18	+	-	+	+	+	+	+	-	+	+	-	+	+	+	+	-	+		-	+	+	+	+	+	+	+	+	+	+	+	+	+	-	-	-	+	+	+	+	-	+	+	+	+	+	+
19	+	-	+	-	+	+	-	-	+	+	-	+	+	+	+	-	+	-		+	-	+	+	+	-	+	+	+	+	+	+	+	-	+	-	+	+	+	+	-	+	+	+	+	+	+
20	+	+	-	+	+	+	+	+	+	+	+	+	+	+	+	+	+	+	+		+	+	+	+	+	+	+	+	+	+	+	+	+	+	+	+	+	+	+	+	+	+	+	+	-	+
21	+	-	+	+	-	-	+	+	+	+	-	+	+	+	+	+	+	+	-	+		+	-	+	-	-	+	+	+	-	+	+	-	+	+	+	+	+	+	-	+	+	-	+	+	+
22	+	+	+	+	+	-	+	+	+	+	+	-	-	+	+	+	+	+	+	+	+		+	+	+	-	-	+	+	+	+	+	+	+	+	+	+	+	+	+	+	+	+	+	+	-
23	+	+	+	+	+	+	-	+	+	+	+	+	+	+	+	+	+	+	+	+	-	+		+	-	-	+	+	+	-	-	+	+	+	+	+	+	+	+	+	+	+	-	+	+	+
24	+	+	+	+	+	-	+	+	+	+	+	+	+	+	+	+	+	+	+	+	+	+	+		+	+	+	+	+	-	+	+	+	+	+	+	+	+	+	+	+	+	-	+	+	+
25	+	-	+	-	+	-	-	+	+	+	-	+	+	+	+	-	+	+	-	+	-	+	-	+		-	+	+	+	-	+	-	-	+	+	+	+	+	+	-	+	-	-	-	+	+
26	+	+	+	+	-	-	+	+	+	+	+	-	+	+	+	+	+	+	+	+	-	-	-	+	-		-	+	+	-	+	+	+	+	+	+	+	+	+	+	+	+	-	+	+	-
27	+	+	+	+	+	-	+	+	+	+	+	-	-	+	+	+	+	+	+	+	+	-	+	+	+	-		+	+	+	+	+	+	+	+	+	+	+	+	+	+	+	+	+	+	-
28	+	+	+	+	+	+	+	+	+	+	+	+	+	+	+	+	+	+	+	+	+	+	+	+	+	+	+		-	+	+	+	+	+	+	+	+	+	+	+	+	+	+	+	+	+
29	+	+	+	+	+	+	+	+	+	+	+	+	+	+	+	+	+	+	+	+	+	+	+	+	+	+	+	-		+	+	+	+	+	+	+	+	+	+	+	+	+	+	+	+	+
30	+	+	+	+	-	-	+	+	+	+	+	+	+	+	+	+	+	+	+	+	-	+	-	-	-	-	+	+	+		+	+	+	+	+	+	+	+	+	+	+	+	-	+	+	+
31	-	+	+	+	+	+	-	+	-	+	+	+	+	+	+	+	+	+	+	+	+	+	-	+	+	+	+	+	+	+		-	+	+	+	+	+	-	+	+	-	-	+	-	+	+
32	-	-	+	-	+	+	-	+	-	+	+	+	+	+	+	+	-	+	+	+	+	+	+	+	-	+	+	+	+	+	-		-	+	+	+	-	+	+	+	+	-	-	-	+	+
33	-	-	+	-	+	+	-	-	+	+	-	+	+	+	+	-	+	-	-	+	-	+	+	+	-	+	+	+	+	+	+	-		-	-	+	-	+	+	-	+	-	-	-	-	+
34	+	+	+	+	+	+	+	-	+	-	+	+	+	+	+	+	+	-	+	+	+	+	+	+	+	+	+	+	+	+	+	+	-		-	+	+	+	+	-	+	+	+	+	+	+
35	+	+	+	+	+	+	+	-	+	+	-	+	+	+	+	+	+	-	-	+	+	+	+	+	+	+	+	+	+	+	+	+	-	-		+	+	+	+	-	+	+	+	+	+	+
36	+	+	+	+	+	+	+	+	+	+	+	+	+	+	+	+	+	+	+	+	+	+	+	+	+	+	+	+	+	+	+	+	+	+	+		+	+	+	+	+	+	+	+	+	+
37	-	+	+	+	+	+	-	+	+	+	+	+	+	+	+	+	+	+	+	+	+	+	+	+	+	+	+	+	+	+	+	-	-	+	+	+		+	+	+	+	-	-	-	+	+
38	+	+	+	+	+	+	+	+	-	+	+	+	+	+	+	+	+	+	+	+	+	+	+	+	+	+	+	+	+	+	-	+	+	+	+	+	+		+	+	-	-	+	-	+	+
39	+	+	+	+	+	+	+	+	+	+	+	+	+	+	+	+	+	+	+	+	+	+	+	+	+	+	+	+	+	+	+	+	+	+	+	+	+	+		+	+	+	+	+	+	+
40	+	-	+	-	+	+	+	-	+	+	-	+	+	+	+	-	+	-	-	+	-	+	+	+	-	+	+	+	+	+	+	+	-	-	-	+	+	+	+		+	+	+	+	-	+
41	+	+	+	+	+	+	+	+	+	+	+	+	+	+	+	+	+	+	+	+	+	+	+	+	+	+	+	+	+	+	-	+	+	+	+	+	+	-	+	+		+	+	+	+	+
42	-	-	+	-	+	+	-	+	-	+	-	+	+	+	+	-	+	+	+	+	+	+	+	+	-	+	+	+	+	+	-	-	-	+	+	+	-	-	+	+	+		-	-	+	+
43	-	-	+	-	+	+	-	+	+	+	+	+	+	+	+	+	+	+	+	+	-	+	-	-	-	-	+	+	+	-	+	-	-	+	+	+	-	+	+	+	+	-		-	+	+
44	-	-	+	-	+	+	-	+	-	+	+	+	+	+	+	+	+	+	+	+	+	+	+	+	-	+	+	+	+	+	-	-	-	+	+	+	-	-	+	+	+	-	-		+	+
45	+	+	-	+	+	+	+	+	+	+	+	+	+	+	+	+	+	+	+	-	+	+	+	+	+	+	+	+	+	+	+	+	-	+	+	+	+	+	+	-	+	+	+	+		+
46	+	+	+	+	+	-	+	+	+	+	+	-	-	-	+	+	+	+	+	+	+	-	+	+	+	-	-	+	+	+	+	+	+	+	+	+	+	+	+	+	+	+	+	+	+
Y-SNPs P

## Sheet: Y-SNPs P I(false)
		1	2	3	4	5	6	7	8	9	10	11	12	13	14	15	16	17	18	19	20	21	22	23	24	25	26	27	28	29	30	31	32	33	34	35	36	37	38	39	40	41	42	43	44	45	46
1	BeijingHan_Hong
2	ManchuHan_Hong	+
3	Japanese_Hong	+	+
4	Korean_Hong	+	-	+
5	Buryats_Hong	+	+	+	+
6	Khalkhs_Hong	+	+	+	+	-
7	YunnanHan_Hong	-	-	+	-	+	+
8	Indonesians_Hong	+	-	+	+	+	+	+
9	Philippines_Hong	-	+	+	+	+	+	+	+
10	Thais_Hong	+	+	+	+	+	+	+	-	+
11	Vietnamese_Hong	+	-	+	-	+	+	-	-	+	+
12	Khalkh_Katoh	+	+	+	+	+	-	+	+	+	+	+
13	Uriankhai_Katoh	+	+	+	+	+	-	+	+	+	+	+	-
14	Zakhchin_Katoh	+	+	+	+	+	-	+	+	+	+	+	-	-
15	Khoton_Katoh	+	+	+	+	+	+	+	+	+	+	+	+	+	+
16	Manchu_Katoh	+	-	+	-	+	+	+	-	+	+	-	+	+	+	+
17	NorthernHan_Katoh	+	+	+	+	+	+	+	+	+	+	+	+	+	+	+	+
18	KoreanChinese_Katoh	+	-	+	+	+	+	+	-	+	+	-	+	+	+	+	-	+
19	Korean_Katoh	+	-	+	-	+	+	-	-	+	+	-	+	+	+	+	-	+	-
20	Japanese_Katoh	+	+	-	+	+	+	+	+	+	+	+	+	+	+	+	+	+	+	+
21	Daur_Xue	+	-	+	+	-	-	+	+	+	+	-	+	+	+	+	+	+	+	-	+
22	Ewenki_Xue	+	+	+	+	+	-	+	+	+	+	+	-	-	+	+	+	+	+	+	+	+
23	Hezhe_Xue	+	+	+	+	+	+	-	+	+	+	+	+	+	+	+	+	+	+	+	+	-	+
24	Hui_Xue	+	+	+	+	+	-	+	+	+	+	+	+	+	+	+	+	+	+	+	+	+	+	+
25	Manchu_Xue	+	-	+	-	+	-	-	+	+	+	-	+	+	+	+	-	+	+	-	+	-	+	-	+
26	InnerMongols_Xue	+	+	+	+	-	-	+	+	+	+	+	-	+	+	+	+	+	+	+	+	-	-	-	+	-
27	Oroqen_Xue	+	+	+	+	+	-	+	+	+	+	+	-	-	+	+	+	+	+	+	+	+	-	+	+	+	-
28	UygurUrumqi_Xue	+	+	+	+	+	+	+	+	+	+	+	+	+	+	+	+	+	+	+	+	+	+	+	+	+	+	+
29	UygurYili_Xue	+	+	+	+	+	+	+	+	+	+	+	+	+	+	+	+	+	+	+	+	+	+	+	+	+	+	+	-
30	Xibe_Xue	+	+	+	+	-	-	+	+	+	+	+	+	+	+	+	+	+	+	+	+	-	+	-	-	-	-	+	+	+
31	HarbinHan_Xue	-	+	+	+	+	+	-	+	-	+	+	+	+	+	+	+	+	+	+	+	+	+	-	+	+	+	+	+	+	+
32	YiliHan_Xue	-	-	+	-	+	+	-	+	-	+	+	+	+	+	+	+	-	+	+	+	+	+	+	+	-	+	+	+	+	+	-
33	KoreanChinese_Xue	-	-	+	-	+	+	-	-	+	+	-	+	+	+	+	-	+	-	-	+	-	+	+	+	-	+	+	+	+	+	+	-
34	Buyi_Xue	+	+	+	+	+	+	+	-	+	-	+	+	+	+	+	+	+	-	+	+	+	+	+	+	+	+	+	+	+	+	+	+	-
35	Hani_Xue	+	+	+	+	+	+	+	-	+	+	-	+	+	+	+	+	+	-	-	+	+	+	+	+	+	+	+	+	+	+	+	+	-	-
36	Li_Xue	+	+	+	+	+	+	+	+	+	+	+	+	+	+	+	+	+	+	+	+	+	+	+	+	+	+	+	+	+	+	+	+	+	+	+
37	Qing_Xue	-	+	+	+	+	+	-	+	+	+	+	+	+	+	+	+	+	+	+	+	+	+	+	+	+	+	+	+	+	+	+	-	-	+	+	+
38	She_Xue	+	+	+	+	+	+	+	+	-	+	+	+	+	+	+	+	+	+	+	+	+	+	+	+	+	+	+	+	+	+	-	+	+	+	+	+	+
39	Tibetans_Xue	+	+	+	+	+	+	+	+	+	+	+	+	+	+	+	+	+	+	+	+	+	+	+	+	+	+	+	+	+	+	+	+	+	+	+	+	+	+
40	YaoBama_Xue	+	-	+	-	+	+	+	-	+	+	-	+	+	+	+	-	+	-	-	+	-	+	+	+	-	+	+	+	+	+	+	+	-	-	-	+	+	+	+
41	YaoLiannan_Xue	+	+	+	+	+	+	+	+	+	+	+	+	+	+	+	+	+	+	+	+	+	+	+	+	+	+	+	+	+	+	-	+	+	+	+	+	+	-	+	+
42	ChengduHan_Xue	-	-	+	-	+	+	-	+	-	+	-	+	+	+	+	-	+	+	+	+	+	+	+	+	-	+	+	+	+	+	-	-	-	+	+	+	-	-	+	+	+
43	LanzhouHan_Xue	-	-	+	-	+	+	-	+	+	+	+	+	+	+	+	+	+	+	+	+	-	+	-	-	-	-	+	+	+	-	+	-	-	+	+	+	-	+	+	+	+	-
44	Meizian_Xue	-	-	+	-	+	+	-	+	-	+	+	+	+	+	+	+	+	+	+	+	+	+	+	+	-	+	+	+	+	+	-	-	-	+	+	+	-	-	+	+	+	-	-
45	Japanese_Xue	+	+	-	+	+	+	+	+	+	+	+	+	+	+	+	+	+	+	+	-	+	+	+	+	+	+	+	+	+	+	+	+	-	+	+	+	+	+	+	-	+	+	+	+
46	OuterMongolia_Xue	+	+	+	+	+	-	+	+	+	+	+	-	-	-	+	+	+	+	+	+	+	-	+	+	+	-	-	+	+	+	+	+	+	+	+	+	+	+	+	+	+	+	+	+	+
Y-SNPs P (95%); -: P>0.05

## Sheet: Y-SPSSfalse
For matrix
Stress=0.16795 RSQ=0.89021
Stimulus	Stimulus		1	2
Number	Name
1	BeijingH	BeijingHan_Hong	0.7768	0.6579
2	ManchuHa	ManchuHan_Hong	0.4985	-0.0001
3	Japanese	Japanese_Hong	0.3785	-0.9434
4	Korean_H	Korean_Hong	0.4662	-0.0189
5	Buryats_	Buryats_Hong	-1.0582	0.4375
6	Khalkhs_	Khalkhs_Hong	-1.0124	0.3134
7	YunnanHa	YunnanHan_Hong	0.5234	0.2127
8	Indonesi	Indonesians_Hong	0.7942	-0.8828
9	Philippi	Philippines_Hong	1.1008	1.1194
10	Thais_Ho	Thais_Hong	1.0437	-2.0026
11	Vietname	Vietnamese_Hong	0.5832	-0.1543
12	Khalkh_K	Khalkh_Katoh	-1.4882	0.8127
13	Uriankha	Uriankhai_Katoh	-1.9811	0.2684
14	Zakhchin	Zakhchin_Katoh	-1.5269	0.0766
15	Khoton_K	Khoton_Katoh	-3.5403	-1.5239
16	Manchu_K	Manchu_Katoh	0.6105	-0.2164
17	Northern	NorthernHan_Katoh	0.3236	1.0708
18	KoreanCh	KoreanChinese_Katoh	0.6339	-0.9689
19	Korean_K	Korean_Katoh	0.2953	-0.3289
20	Japane_1	Japanese_Katoh	0.4611	-1.4292
21	Daur_Xue	Daur_Xue	-0.14	-0.0631
22	Ewenki_X	Ewenki_Xue	-1.1684	0.9897
23	Hezhe_Xu	Hezhe_Xue	0.0486	0.8384
24	Hui_Xue	Hui_Xue	-0.6867	-0.0479
25	Manchu_X	Manchu_Xue	0.0251	0.2636
26	InnerMon	InnerMongols_Xue	-0.7761	0.8283
27	Oroqen_X	Oroqen_Xue	-1.4622	0.9379
28	UygurUru	UygurUrumqi_Xue	-1.6885	-0.8425
29	UygurYil	UygurYili_Xue	-1.5082	-0.3032
30	Xibe_Xue	Xibe_Xue	-0.4395	0.2938
31	HarbinHa	HarbinHan_Xue	0.9539	1.1349
32	YiliHan_	YiliHan_Xue	0.3259	0.2384
33	Korean_1	KoreanChinese_Xue	0.5242	-0.1891
34	Buyi_Xue	Buyi_Xue	1.1678	-1.2039
35	Hani_Xue	Hani_Xue	0.3501	-1.2337
36	Li_Xue	Li_Xue	0.9003	-2.531
37	Qing_Xue	Qing_Xue	0.5186	-0.1888
38	She_Xue	She_Xue	1.6607	1.264
39	Tibetans	Tibetans_Xue	0.6383	1.2931
40	YaoBama_	YaoBama_Xue	0.5833	-0.4594
41	YaoLiann	YaoLiannan_Xue	2.0206	1.6606
42	ChengduH	ChengduHan_Xue	0.8152	0.3985
43	LanzhouH	LanzhouHan_Xue	-0.085	0.3504
44	Meizian_	MeixianHan_Xue	0.7947	0.4139
45	Japane_2	Japanese_Xue	0.3734	-0.7327
46	OuterMon	OuterMongolia_Xue	-1.6286	0.3898
	Stress=0.20

## Sheet: false
Figure. MDS plot of FST distances (Y haplogroups); Stress=0.17

## Sheet: mtHGs
Table S4. FST distances of mtDNA haplogroups in east Asian populations (non-significant values are underlined)
		1	2	3	4	5	6	7	8	9	10	11	12	13	14	15	16	17	18	19	20	21	22	23	24	25	26	27	28	29	30	31
1	Koreaa
2	Korean-Chinesea	0.00029
3	Manchuriana	-0.00205	0.00127
4	Han (Beijing)a	0.01035	0.01572	-0.01227
5	Mongoliana	0.03764	0.04585	0.01507	0.00836
6	Japanesea	0.00407	0.0081	0.0105	0.03063	0.06145
7	Han (Guangdong)b	0.04482	0.05939	0.03271	0.04101	0.06377	0.08485
8	Vietnamesea	0.01233	0.01628	-0.00836	-0.00344	0.01675	0.03657	0.0155
9	Thaisa	0.06748	0.04879	0.03594	0.03748	0.03029	0.09379	0.05886	0.02288
10	Han (Liaoning)c	0.00423	0.00132	0.0014	0.01232	0.02658	0.02482	0.02803	0.01125	0.0381
11	Han (Qingdao)c	-0.00056	-0.00524	-0.0022	0.00256	0.03958	0.01505	0.03447	0.007	0.04851	-0.00598
12	Han (Xinjiang)c	0.00928	0.00305	-0.00795	0.00025	0.01566	0.02007	0.04773	0.00796	0.02079	-0.00212	0.00152
13	Han (Wuhan)c	0.02991	0.03581	0.0045	0.00924	0.01666	0.0603	0.03507	0.01015	0.03524	0.0127	0.02709	0.00212
14	Han (Yunnan)c	0.02633	0.02549	0.00233	0.00709	0.02841	0.05583	0.01017	0.00202	0.00971	0.0156	0.01729	0.00491	0.00106
15	Han (Zhanjiang)c	0.04672	0.02958	0.03727	0.04311	0.05893	0.08035	0.02862	0.02209	0.03317	0.01108	0.02617	0.03316	0.04226	0.02775
16	Koreand	-0.00088	-0.00168	-0.00262	0.01152	0.03619	0.00534	0.05124	0.01424	0.06138	0.0066	0.00141	0.00605	0.02987	0.02529	0.04686
17	MHNe	0.01596	0.0134	-0.00456	0.00349	0.01189	0.03549	0.02781	0.00026	0.02433	0.00273	0.01172	-0.00498	0.00318	0.00219	0.02768	0.01218
18	MYNe	0.04618	0.02308	0.0401	0.05388	0.06021	0.06426	0.05803	0.03787	0.03299	0.01302	0.03755	0.02354	0.04912	0.03076	0.01607	0.03797	0.01763
19	YBN/YMBe	0.02712	0.0403	0.00832	0.01996	0.04859	0.05789	-0.00325	0.00459	0.03414	0.01452	0.03002	0.02233	0.01475	-0.01078	0.03028	0.03332	0.01302	0.03193
20	YBPe	0.04447	0.04388	0.02928	0.03923	0.05613	0.07829	0.01782	0.015	0.0409	0.01864	0.04075	0.03147	0.01722	0.0104	0.02973	0.04426	0.01542	0.00955	-0.00639
21	YDB/YYMe	0.0726	0.09297	0.08808	0.10747	0.12753	0.10729	0.03237	0.08674	0.15876	0.06396	0.08048	0.1103	0.10187	0.07917	0.08688	0.07762	0.0744	0.09337	0.05156	0.0635
22	YGSe	0.04373	0.02022	0.03643	0.04594	0.06871	0.06251	0.06664	0.03204	0.04184	0.02215	0.03587	0.02231	0.03826	0.0267	0.03661	0.03485	0.02077	-0.01682	0.03286	-0.00408	0.11747
23	YHT/YKBe	0.04656	0.05348	0.02261	0.02067	0.01898	0.08912	0.00303	0.00787	0.0198	0.02041	0.0398	0.02705	0.01556	-0.0011	0.03282	0.04885	0.00691	0.03026	-0.00412	-0.00356	0.06916	0.03414
24	YMIe	0.02503	0.0371	0.01723	0.0239	0.01947	0.05179	0.01352	0.02195	0.03766	0.01431	0.02805	0.01613	0.02132	-0.00248	0.052	0.0265	0.00549	0.03154	-0.00035	0.02106	0.04258	0.04461	-0.00516
25	YPAe	0.05961	0.06068	0.02419	0.02995	0.04474	0.09315	0.0245	0.01246	0.01378	0.04445	0.05109	0.02542	0.01676	-0.008	0.05814	0.05636	0.01543	0.04123	0.00094	0.00091	0.11557	0.0267	-0.00964	0.01653
26	YTUe	0.0376	0.04598	0.03184	0.04278	0.05084	0.0722	0.01152	0.02683	0.04329	0.01452	0.0395	0.02947	0.02326	0.00498	0.03895	0.04166	0.01743	0.01596	-0.00924	-0.00686	0.05447	0.01739	-0.00897	-0.00436	0.00707
27	YKMe	0.04031	0.02551	0.03505	0.04359	0.03341	0.06261	0.05144	0.03508	0.03321	0.00875	0.03514	0.01496	0.03725	0.0272	0.02444	0.03475	0.00688	-0.01191	0.03718	0.02013	0.08137	0.0082	0.01552	0.00902	0.03944	0.01182
28	YLTe	0.04904	0.06186	0.02126	0.01634	0.02026	0.089	0.0004	0.0043	0.0236	0.03023	0.04108	0.02484	0.01241	-0.00497	0.04676	0.05083	0.00592	0.048	-0.00284	0.00449	0.07246	0.05045	-0.02766	-0.00659	-0.01642	0.00252	0.02751
29	YLOe	0.01512	0.01384	0.00415	0.01283	0.02889	0.0444	-0.00084	-0.00682	0.02796	0.00433	0.00612	0.0088	0.01491	-0.00415	0.0001	0.01643	0.00066	0.01975	0.00052	0.00715	0.04872	0.02268	-0.0002	0.00297	0.01375	0.00928	0.01481	0.00133
30	YWUe	0.06462	0.0663	0.0385	0.04827	0.04372	0.09526	0.04212	0.05423	0.03452	0.04022	0.06068	0.03282	0.02089	0.0002	0.07255	0.05994	0.02608	0.05311	0.01139	0.03458	0.08535	0.06357	0.01751	-0.00423	0.01795	0.02068	0.03956	0.01251	0.03516
31	Drausf	0.02007	0.03178	0.00897	0.01252	0.01473	0.0365	0.04027	0.02935	0.05015	0.00817	0.02289	0.01185	0.02167	0.01654	0.04969	0.02047	0.01105	0.04767	0.01677	0.04763	0.06498	0.06649	0.02939	-0.00101	0.05332	0.03317	0.0307	0.02435	0.02415	0.01127
32	Oroqenf	0.05877	0.06386	0.04431	0.0388	0.02568	0.05321	0.13261	0.06391	0.09472	0.06762	0.06349	0.04176	0.0799	0.08926	0.11768	0.04881	0.0464	0.10215	0.12076	0.13297	0.17733	0.11763	0.10791	0.07277	0.12633	0.13212	0.07799	0.09791	0.08084	0.11056	0.03804
33	Ewenkif	0.0375	0.04197	0.02461	0.02653	0.01716	0.04044	0.09045	0.04198	0.07489	0.03722	0.04138	0.02463	0.05018	0.05726	0.08135	0.03051	0.02422	0.06603	0.0768	0.08487	0.12024	0.07909	0.06809	0.03823	0.089	0.08431	0.0454	0.06244	0.04747	0.07167	0.01461
34	Koreanf	0.0051	-0.00017	0.00233	0.00992	0.03022	0.01352	0.06957	0.03148	0.06051	-0.00176	0.00548	-0.00183	0.02302	0.03238	0.04727	0.00394	0.01166	0.03538	0.04709	0.05624	0.10698	0.03815	0.05148	0.03295	0.06896	0.04237	0.02648	0.06054	0.03221	0.05966	0.01367
35	Mongolianf	-0.0015	-0.00862	0.00149	0.00809	0.02842	0.00154	0.06709	0.0171	0.06354	0.00692	-0.00178	0.00161	0.03755	0.03647	0.04731	-0.00217	0.01253	0.04161	0.05388	0.06193	0.09695	0.04263	0.05938	0.0317	0.07501	0.06005	0.02954	0.05986	0.01788	0.07588	0.02121
36	POg	0.07112	0.06328	0.02365	0.03016	0.06952	0.1031	0.04331	0.02644	0.02957	0.05437	0.05385	0.03776	0.04124	0.00949	0.0614	0.06787	0.033	0.06339	0.01099	0.03245	0.13939	0.05275	0.01606	0.05072	0.00175	0.04431	0.07138	0.02173	0.02974	0.04634	0.07251
37	CLg	0.0351	0.0348	0.01838	0.03437	0.04778	0.06174	0.02166	0.02248	0.02868	0.01197	0.03348	0.01649	0.01737	0.00058	0.02003	0.03565	0.01131	0.00977	-0.00992	0.00375	0.07453	0.01964	0.01001	0.00912	0.01146	-0.00163	0.01304	0.0158	0.00796	0.0149	0.02362
38	CX/CYg	0.03789	0.03464	0.02165	0.03206	0.04751	0.0654	0.02228	0.02564	0.02022	0.02544	0.03098	0.01879	0.02179	-0.01526	0.04314	0.03575	0.01473	0.02568	-0.00368	0.01727	0.07542	0.02904	0.00994	-0.00796	0.00062	0.00154	0.02107	0.0078	0.00857	-0.00815	0.02307
39	GLg	0.03637	0.0201	0.01084	0.01769	0.02153	0.0535	0.04898	0.02287	-0.00733	0.01921	0.02258	-0.00039	0.02428	-0.00319	0.03041	0.02997	0.00882	0.02812	0.02489	0.04673	0.12235	0.04156	0.02382	0.00975	0.02437	0.03648	0.02145	0.02779	0.01245	0.01278	0.01807
40	HSg	0.08399	0.08077	0.04227	0.04801	0.0753	0.11881	0.04224	0.04028	0.03585	0.05421	0.06773	0.04268	0.03671	0.01161	0.06893	0.07896	0.03311	0.04243	0.00706	0.0072	0.1298	0.02731	0.00469	0.03913	-0.01062	0.01954	0.0525	0.0114	0.03437	0.03235	0.07443
41	MLg	0.03542	0.0272	0.00414	0.01759	0.03689	0.06259	0.02225	0.00625	0.00296	0.01485	0.02649	0.00436	0.0075	-0.01322	0.02496	0.03303	0.0047	0.01734	-0.01256	0.00072	0.10008	0.01179	-0.00196	0.01276	-0.01034	0.00468	0.02422	0.00573	0.00153	0.01254	0.03344
42	MNg	0.0664	0.0769	0.05263	0.06685	0.07593	0.11003	0.00905	0.05021	0.0683	0.04494	0.06013	0.06773	0.03833	0.01032	0.05794	0.06888	0.04476	0.07082	0.00405	0.03279	0.03363	0.08361	0.02208	0.00917	0.03878	0.0193	0.06332	0.02274	0.02628	0.00034	0.03551
43	PYg	0.09272	0.09091	0.06304	0.06638	0.0526	0.11035	0.10863	0.08799	0.04579	0.08594	0.08885	0.05032	0.06328	0.03808	0.1243	0.08506	0.05918	0.11131	0.08046	0.12312	0.18506	0.12876	0.07978	0.04014	0.07243	0.09646	0.08729	0.07012	0.0815	0.01896	0.04288
44	WSg	0.03833	0.04775	0.01831	0.0225	0.04293	0.07644	-0.00026	0.0019	0.04524	0.03269	0.03504	0.0331	0.01926	-0.0046	0.04455	0.04065	0.01112	0.0419	-0.00764	-0.00132	0.05137	0.03482	-0.01111	0.00064	-0.00836	0.00277	0.03123	-0.01784	-0.00508	0.02566	0.04075
45	MKg	0.08396	0.0878	0.05206	0.06775	0.08929	0.1121	0.04832	0.07181	0.04773	0.06478	0.07714	0.05212	0.0534	0.00638	0.08568	0.08051	0.05153	0.07187	0.00814	0.05525	0.11889	0.08067	0.03663	0.02195	0.02059	0.0295	0.07356	0.03651	0.0498	-0.0043	0.04671
46	MOg	0.03561	0.0202	0.01143	0.02725	0.04722	0.05537	0.03911	0.03122	0.02495	0.01309	0.02626	0.00832	0.02644	0.00479	0.03711	0.02958	0.00772	0.01156	0.00818	0.01388	0.08402	0.01546	0.01393	0.01168	0.01542	0.01746	0.01613	0.02253	0.01378	0.00936	0.02203
47	RG/GAg	0.09401	0.10643	0.05546	0.08171	0.08772	0.10462	0.09911	0.07818	0.08934	0.09156	0.09299	0.07525	0.08809	0.06318	0.12135	0.08356	0.06664	0.10541	0.08031	0.09926	0.16873	0.12038	0.08367	0.07727	0.05776	0.08909	0.10159	0.07279	0.08623	0.07294	0.0749
48	TNg	0.07832	0.07771	0.05971	0.07849	0.08087	0.11399	0.03116	0.07187	0.05466	0.04526	0.06917	0.05599	0.04451	0.01358	0.0632	0.07424	0.04207	0.05783	0.02177	0.05011	0.06501	0.08083	0.03073	0.00885	0.04522	0.02233	0.04952	0.036	0.03917	-0.00901	0.03254
49	CUg	0.04879	0.04278	0.02521	0.03958	0.04126	0.08079	0.01766	0.02995	0.0331	0.01144	0.03843	0.02996	0.0344	0.01394	0.01016	0.04638	0.01106	0.0165	0.00617	0.02135	0.04546	0.05133	0.00477	0.00645	0.03646	0.01623	0.00641	0.01546	0.00853	0.0152	0.01614
50	DGg	0.06256	0.06071	0.038	0.04885	0.0432	0.0937	0.04087	0.04393	0.03949	0.02999	0.06281	0.03275	0.01563	0.0128	0.04618	0.05642	0.01543	0.01602	0.01289	0.0053	0.08013	0.0225	0.00785	0.01113	0.01742	0.0063	0.01362	0.01673	0.02743	0.00416	0.02847
51	HLg	0.06324	0.04853	0.04172	0.06097	0.07221	0.092	0.04417	0.04666	0.04254	0.01981	0.05227	0.04414	0.04726	0.03088	0.00863	0.0581	0.02895	0.00126	0.01834	0.0132	0.08079	0.0256	0.02771	0.04286	0.045	0.0204	0.01582	0.04875	0.02893	0.04265	0.04732
52	JMg	0.09127	0.09437	0.06263	0.07678	0.09237	0.12719	0.05115	0.08045	0.09102	0.05472	0.07781	0.05637	0.05451	0.04067	0.06426	0.08939	0.04652	0.06361	0.0386	0.05141	0.09046	0.08706	0.03889	0.03878	0.04813	0.04161	0.04433	0.03796	0.04337	0.03443	0.06238
53	LGg	0.04694	0.04109	0.00062	0.01207	0.02677	0.07531	0.03636	0.01611	0.0195	0.02128	0.03396	0.00909	0.0047	-0.00096	0.03478	0.04086	0.00401	0.03614	0.00796	0.01872	0.10906	0.03945	0.00568	0.02375	0.00348	0.02867	0.0324	0.01061	0.01421	0.01287	0.02947
54	BGg	0.06819	0.07695	0.02496	0.03269	0.06468	0.08807	0.06365	0.01351	0.05451	0.08112	0.06131	0.05573	0.07282	0.04079	0.09463	0.06674	0.04849	0.10587	0.04872	0.07276	0.17429	0.0953	0.04475	0.0757	0.02656	0.08387	0.10632	0.03883	0.04187	0.10846	0.0954
55	BUg	0.06799	0.08179	0.02799	0.02831	0.03422	0.10783	0.01788	0.02349	0.02768	0.05267	0.06105	0.04306	0.02539	-0.001	0.06649	0.06883	0.02562	0.07485	0.00485	0.03338	0.10621	0.07961	-0.01035	0.01068	-0.00624	0.02103	0.05988	-0.01356	0.02306	0.01445	0.04062
56	DAg	0.03757	0.02893	0.0113	0.0163	0.01893	0.06465	0.02689	0.01143	0.00275	0.01135	0.02853	0.00237	0.0088	-0.00531	0.01852	0.03401	-0.00284	0.01448	0.0061	0.01739	0.08755	0.02981	-8e-05	0.00308	0.00734	0.01264	0.00199	-0.00057	0.00499	0.00822	0.01384
57	LCg	0.09049	0.0902	0.07094	0.08731	0.07846	0.12816	0.03272	0.07656	0.05182	0.05348	0.0823	0.06553	0.05737	0.0206	0.05547	0.08596	0.04603	0.05302	0.02658	0.04996	0.06572	0.08647	0.02453	0.00929	0.04295	0.02289	0.04038	0.02853	0.03876	-0.00639	0.03626
58	LQ/WGg	0.06094	0.04592	0.03022	0.04154	0.03111	0.08609	0.04552	0.03623	-0.00129	0.0295	0.04864	0.02192	0.03828	0.00561	0.03085	0.05251	0.01483	0.02003	0.02369	0.0427	0.10857	0.04767	0.01381	0.0094	0.023	0.02867	0.01224	0.02125	0.02147	0.00458	0.02324
59	Daic/AAg	0.05517	0.05594	0.02263	0.02927	0.04626	0.0858	0.01925	0.00947	0.01508	0.03995	0.04285	0.02767	0.02944	-0.00128	0.0464	0.05332	0.01681	0.04081	0.00448	0.01109	0.10282	0.0378	-0.0052	0.01865	-0.017	0.01414	0.03797	-0.00953	0.00974	0.0321	0.05315
Table S4. (continued)
		32	33	34	35	36	37	38	39	40	41	42	43	44	45	46	47	48	49	50	51	52	53	54	55	56	57	58	59
1	Koreaa
2	Korean-Chinesea
3	Manchuriana
4	Han (Beijing)a
5	Mongoliana
6	Japanesea
7	Han (Guangdong)b
8	Vietnamesea
9	Thaisa
10	Han (Liaoning)c
11	Han (Qingdao)c
12	Han (Xinjiang)c
13	Han (Wuhan)c
14	Han (Yunnan)c
15	Han (Zhanjiang)c
16	Koreand
17	MHNe
18	MYNe
19	YBN/YMBe
20	YBPe
21	YDB/YYMe
22	YGSe
23	YHT/YKBe
24	YMIe
25	YPAe
26	YTUe
27	YKMe
28	YLTe
29	YLOe
30	YWUe
31	Drausf
32	Oroqenf
33	Ewenkif	0.0013
34	Koreanf	0.04763	0.02972
35	Mongolianf	0.02553	0.01554	0.00039
36	POg	0.14269	0.1089	0.07791	0.08534
37	CLg	0.11094	0.07059	0.03861	0.05124	0.0318
38	CX/CYg	0.11002	0.07197	0.04604	0.04994	0.0288	-0.00684
39	GLg	0.05935	0.04084	0.02676	0.0278	0.02645	0.01349	0.00081
40	HSg	0.1574	0.11494	0.08603	0.10142	-0.01305	0.01961	0.0203	0.04029
41	MLg	0.10584	0.07049	0.03717	0.04671	-0.0109	-0.00389	-0.00307	-0.00222	-0.00989
42	MNg	0.15857	0.10744	0.08615	0.09376	0.06137	0.01998	0.00341	0.04852	0.05284	0.0303
43	PYg	0.08545	0.07651	0.08218	0.08717	0.08668	0.05799	0.03218	0.00658	0.09963	0.0571	0.07591
44	WSg	0.11671	0.0753	0.06562	0.0533	0.02074	0.00685	-0.0002	0.03851	0.01321	0.00563	0.01252	0.08719
45	MKg	0.16032	0.11828	0.08353	0.10886	0.02556	0.01892	-0.00228	0.02198	0.01908	0.00836	0.02103	0.0415	0.04195
46	MOg	0.09111	0.0565	0.02819	0.03851	0.01236	-0.00972	0.00284	-0.0035	0.01159	-0.00809	0.03717	0.04331	0.02199	0.01781
47	RG/GAg	0.12908	0.10334	0.09544	0.11596	0.08965	0.06294	0.0619	0.07479	0.0903	0.07082	0.10203	0.10372	0.08163	0.06753	0.07294
48	TNg	0.15005	0.10252	0.07085	0.0967	0.06373	0.02718	0.0057	0.02584	0.05195	0.02625	-0.00649	0.05347	0.04534	0.00114	0.02452	0.10049
49	CUg	0.1006	0.05958	0.04589	0.05445	0.03599	0.00286	0.01383	0.01317	0.03483	0.00977	0.0152	0.07428	0.02002	0.03443	0.00404	0.0802	0.00993
50	DGg	0.10857	0.06771	0.05075	0.07266	0.04747	-0.00898	0.00853	0.0252	0.02017	0.00968	0.02407	0.06193	0.01976	0.03026	-0.00056	0.07892	0.01756	0.00695
51	HLg	0.13749	0.09128	0.05337	0.07686	0.04726	-0.00243	0.02751	0.03363	0.03503	0.01441	0.04189	0.11329	0.043	0.04977	0.00885	0.08053	0.03674	-0.01071	0.00576
52	JMg	0.16471	0.11462	0.09035	0.10396	0.05425	0.01617	0.03103	0.0622	0.03618	0.03735	0.04584	0.1037	0.03231	0.0402	0.0296	0.09041	0.04888	0.01164	0.03053	0.03297
53	LGg	0.0918	0.059	0.03951	0.0541	-0.00884	0.00676	0.01294	0.00444	-0.00299	-0.01393	0.03758	0.05503	0.01464	0.01962	-0.00397	0.04793	0.03559	-0.00051	0.00891	0.01105	0.01344
54	BGg	0.11719	0.09994	0.09756	0.0805	0.01537	0.07419	0.07023	0.05561	0.0488	0.03204	0.11675	0.12097	0.03885	0.09236	0.06589	0.07723	0.13523	0.0864	0.1037	0.10564	0.12437	0.03585
55	BUg	0.12011	0.08634	0.07649	0.08795	0.00786	0.01703	0.00964	0.02083	0.01029	0.00491	0.02217	0.04676	0.00159	0.01345	0.02322	0.05748	0.03108	0.02312	0.0212	0.05091	0.0445	0.00149	0.03001
56	DAg	0.07246	0.04521	0.02851	0.03564	0.02475	0.00151	0.0006	-0.00391	0.02351	-0.00385	0.03274	0.04242	0.01198	0.02859	0.00464	0.07018	0.02213	-0.00463	0.00727	0.01538	0.03018	-0.00178	0.06098	0.01363
57	LCg	0.15345	0.10531	0.08593	0.10699	0.07068	0.0219	0.00705	0.03092	0.0548	0.0327	-0.00123	0.06016	0.04161	0.00729	0.02872	0.08774	-0.02277	0.00081	0.01466	0.02795	0.03242	0.03656	0.13644	0.02815	0.01865
58	LQ/WGg	0.08432	0.05756	0.0473	0.05847	0.03114	0.01174	0.0032	-0.01316	0.03251	0.00318	0.03531	0.02619	0.03628	0.01581	0.00427	0.06396	0.00979	-0.00605	0.01274	0.01459	0.04349	0.00382	0.07432	0.01734	-0.00808	0.0031
59	Daic/AAg	0.11647	0.08386	0.06828	0.06805	0.00452	0.01487	0.00754	0.02054	0.00128	-0.00441	0.04257	0.07712	-0.0028	0.02942	0.01877	0.05731	0.04883	0.0262	0.02917	0.03919	0.04753	0.00594	0.0183	-0.00213	0.00872	0.04452	0.02046
aPresent work; bKivisild et al. [20]; cYao et al. [19]; dLee et al. [30]; eWen et al. [27]; fKong et al. [25]; gLi et al. [36].
