# Supplementary material for: The Peopling of Korea Revealed by Analyses of Mitochondrial DNA and Y-Chromosomal Markers
Source: PLoS One. 2009 Jan 16;4(1):e4210. doi: 10.1371/journal.pone.0004210 (PMC2615218; doi:10.1371/journal.pone.0004210)
Supplement: Table S5 — F ST values of mtDNA HVR-I Sequences in east Asian populations (non-significant values are underlined). aPresent work; bMaruyama et al. [26]; cKivisild et al. [20]; dKong et al. [25]; eYao et al. [19]; fZhang et al. [28]; gLi et al. [36]; hPowell et al. [37] (0.07 MB XLS) [file pone.0004210.s005.xls]

## Sheet: sheet1
Table S5. FST values of mtDNA HVR-I Sequences in east Asian populations (non-significant values are underlined)
		1	2	3	4	5	6	7	8	9	10	11	12	13	14	15	16	17	18
1	Koreana
2	Korean-Chinesea	-0.00235
3	Mongoliana	0.0141	0.01057
4	Manchuriana	0.00575	0.00762	0.00151
5	Han (Beijing)a	0.00195	0.00263	0.0006	0.00118
6	Vietnamesea	0.02389	0.03072	0.01063	0.00649	0.00395
7	Thaisa	0.04596	0.04571	0.01419	0.02441	0.0136	0.00155
8	Japaneseb	0.00729	0.00203	0.0245	0.01281	0.01461	0.03528	0.0575
9	Han (Guangdong)c	0.04142	0.05018	0.04538	0.04656	0.02065	0.01853	0.03069	0.0623
10	Daurd	0.00912	0.00772	0.0074	0.00639	0.00605	0.02874	0.03661	0.01339	0.04255
11	Ewenkid	0.02501	0.02953	0.0117	0.01606	0.02026	0.03501	0.04874	0.03142	0.0654	0.01348
12	Koreand	0.00514	-0.00655	0.01996	0.01557	0.01278	0.04229	0.05666	0.0058	0.06798	0.01456	0.03111
13	Mongold	0.0099	-0.00052	0.00639	-0.00022	0.00197	0.01522	0.03605	0.00753	0.04859	0.00684	0.01641	0.00959
14	Oroqend	0.03517	0.03383	0.02034	0.03473	0.03936	0.06484	0.0808	0.04189	0.11075	0.03772	0.03127	0.04071	0.03454
15	Han (Zhanjiang)e	0.00898	0.01326	0.01297	0.00934	-0.00367	-0.00448	0.01931	0.02503	0.00146	0.01752	0.03834	0.03138	0.01066	0.06112
16	Han (Liaoning)e	-0.00248	-0.00142	0.00645	0.00179	-0.00152	0.02037	0.03103	0.00848	0.03196	0.00135	0.01408	0.00406	0.00589	0.03481	0.0065
17	Han (Qingdao)e	-0.00209	-0.00498	0.00348	-0.00199	-0.006	0.01615	0.02831	0.00675	0.03747	0.0056	0.02098	0.00565	-5e-05	0.03572	0.00469	-0.00587
18	Han (Wuhan)e	0.01931	0.01728	0.01908	0.01887	0.00256	0.01868	0.0181	0.03822	0.01945	0.02062	0.04094	0.02795	0.02498	0.07024	0.00563	0.00675	0.01078
19	Han (Xinjiang)e	0.00587	0.00488	-0.00196	-0.00578	-0.00106	0.01163	0.01995	0.00959	0.04162	0.00563	0.01242	0.01	-0.00012	0.02873	0.01232	-0.00344	-0.00298	0.01012
20	Han (Yunnan)e	0.02898	0.02734	0.0209	0.02317	0.00862	0.00837	0.01138	0.04357	-0.00141	0.02299	0.05119	0.04844	0.02925	0.08151	-4e-05	0.01982	0.01966	0.00651
21	Han (Yanbian)f	0.00507	-0.00115	0.00564	-0.00192	0.00569	0.01988	0.03433	0.00959	0.0566	0.00326	0.01377	0.00806	-0.00101	0.02471	0.01862	0.00114	-0.0005	0.02103
22	BGg	0.08254	0.09094	0.05587	0.05853	0.04709	0.02895	0.03788	0.09193	0.06292	0.0902	0.0916	0.10267	0.0666	0.11185	0.04735	0.07734	0.0701	0.07572
23	Bug	0.05101	0.05121	0.02364	0.03548	0.03017	0.01363	0.01215	0.06158	0.03034	0.04038	0.05306	0.06241	0.04233	0.09321	0.02167	0.04058	0.04247	0.03066
24	CLg	0.04811	0.04393	0.04003	0.04305	0.02868	0.02787	0.0129	0.05874	0.02195	0.03593	0.06632	0.06099	0.04492	0.11654	0.02577	0.03155	0.03762	0.02176
25	CUg	0.05039	0.05508	0.02883	0.04348	0.03081	0.02381	0.01661	0.069	0.02385	0.04117	0.04888	0.06972	0.04634	0.10036	0.02553	0.02927	0.04299	0.03078
26	CXg	0.04331	0.03817	0.02656	0.02676	0.02727	0.02408	0.0081	0.05142	0.03519	0.0258	0.05246	0.05681	0.03497	0.09833	0.03101	0.03064	0.03078	0.02909
27	Dag	0.03072	0.02726	0.00775	0.01037	0.01683	0.0058	0.0066	0.03665	0.03931	0.01775	0.02912	0.03735	0.01555	0.06195	0.01678	0.02124	0.02185	0.02244
28	DGg	0.04492	0.03991	0.03772	0.04095	0.03519	0.03856	0.03143	0.05358	0.03671	0.03476	0.04873	0.04978	0.04171	0.09203	0.03275	0.02464	0.04147	0.02756
29	GLg	0.04792	0.0384	0.01576	0.02321	0.03216	0.02924	0.01326	0.05129	0.05596	0.02638	0.04695	0.05193	0.03395	0.07514	0.03599	0.03146	0.03058	0.03281
30	HLg	0.03956	0.0471	0.03599	0.03406	0.03131	0.03057	0.03028	0.05827	0.03764	0.03746	0.0546	0.05992	0.04587	0.10131	0.0231	0.02277	0.03627	0.02832
31	HSg	0.07548	0.07868	0.04827	0.05997	0.04526	0.03463	0.01633	0.0919	0.03596	0.06419	0.07258	0.09217	0.06465	0.126	0.04189	0.05357	0.06141	0.03317
32	JMg	0.11675	0.13071	0.09776	0.0967	0.09477	0.08887	0.07417	0.14095	0.06807	0.11015	0.12793	0.1572	0.11941	0.19189	0.08742	0.09324	0.11013	0.07643
33	KNg	0.03638	0.04072	0.02449	0.01996	0.01399	0.00755	0.00077	0.04818	0.01648	0.03334	0.05015	0.05359	0.03125	0.09346	0.01206	0.02474	0.02402	0.02318
34	LCg	0.06799	0.06305	0.04844	0.06059	0.04552	0.03844	0.02046	0.07919	0.02459	0.04952	0.07808	0.07623	0.06365	0.12749	0.03176	0.04634	0.05434	0.02738
35	LGg	0.02621	0.02864	0.00405	0.00806	0.00884	0.00545	0.00565	0.03813	0.03571	0.0223	0.02079	0.03771	0.0154	0.05992	0.01649	0.01016	0.01421	0.01871
36	LQg	0.0464	0.03362	0.01961	0.02541	0.02738	0.0394	0.01929	0.04473	0.05739	0.02042	0.04904	0.04536	0.03088	0.07413	0.04036	0.03154	0.03025	0.04317
37	MKg	0.06532	0.05739	0.04244	0.04703	0.03972	0.0322	0.01651	0.06875	0.0348	0.04321	0.0693	0.07331	0.04828	0.1149	0.03525	0.04825	0.0506	0.04055
38	MLg	0.0425	0.03631	0.02444	0.02633	0.01993	0.02143	0.01202	0.04948	0.03253	0.03085	0.04476	0.05191	0.02556	0.09238	0.02679	0.02647	0.02867	0.02442
39	MNg	0.07459	0.06718	0.05903	0.07409	0.05769	0.05425	0.04506	0.09247	0.03739	0.05681	0.08767	0.09099	0.07024	0.14317	0.04072	0.05935	0.06384	0.04842
40	MOg	0.04418	0.03779	0.03733	0.04451	0.03508	0.05058	0.05593	0.04771	0.05145	0.03836	0.04799	0.04856	0.03382	0.08031	0.03698	0.03193	0.04028	0.04592
41	POg	0.05164	0.05195	0.0281	0.02676	0.02755	0.01303	0.01737	0.06147	0.04376	0.04485	0.04854	0.06169	0.0339	0.0866	0.02995	0.04204	0.04145	0.03609
42	PYg	0.06669	0.05658	0.03164	0.0559	0.05034	0.05745	0.0192	0.07126	0.07	0.03856	0.0669	0.07298	0.05947	0.09992	0.06439	0.05218	0.05059	0.04298
43	RGg	0.02409	0.0143	0.03354	0.02646	0.01992	0.04172	0.04324	0.01803	0.05898	0.03561	0.05165	0.02514	0.01927	0.07146	0.03195	0.02019	0.01939	0.03971
44	TNg	0.06188	0.04806	0.04999	0.06197	0.05064	0.05696	0.03794	0.0719	0.04109	0.04266	0.07968	0.06558	0.05889	0.12082	0.04644	0.04358	0.05206	0.03723
45	WSg	0.07199	0.07166	0.05532	0.0567	0.04373	0.03335	0.0394	0.09159	0.0332	0.06104	0.07847	0.08827	0.05939	0.12576	0.0281	0.05553	0.06224	0.04617
46	Hezheh	0.04712	0.05124	0.02728	0.0277	0.03873	0.0519	0.05698	0.05535	0.07479	0.03538	0.04143	0.06033	0.04595	0.0455	0.04405	0.03683	0.04378	0.04251
47	Han (Harbin)h	0.00185	0.00402	0.00607	0.00912	-0.00813	0.00716	0.01623	0.01999	0.00152	0.00224	0.01934	0.01507	0.01052	0.05026	-0.00722	-0.00678	0.00232	-0.01239
48	Han (Xinjiang)h	0.02191	0.02298	-0.00687	0.00257	0.00601	0.00671	0.00591	0.03611	0.03663	0.01522	0.01204	0.0333	0.0135	0.0429	0.01492	0.0082	0.01464	0.00547
49	Koreanh	-0.00693	-0.01091	0.00088	-0.00191	-0.00194	0.02366	0.04231	-0.0002	0.04245	-0.00236	0.01554	0.00157	-0.0053	0.03288	0.00427	-0.00988	-0.01141	0.02073
50	Manchurianh	0.01884	0.01413	-0.0086	-0.00234	0.00208	0.00271	0.00044	0.02595	0.04185	0.01371	0.01569	0.02415	0.00593	0.03615	0.01456	0.00437	0.00364	0.01131
51	Uygur (Urumqi)h	0.01124	0.00882	0.00011	-0.00117	0.01043	0.03451	0.03442	0.02156	0.06469	0.01638	0.01405	0.01672	0.00951	0.02011	0.02789	-0.00465	0.0008	0.01653
52	Uygur (Yili)h	0.01459	0.01148	0.0011	-0.00019	0.01299	0.0194	0.02486	0.021	0.05547	0.00754	0.01098	0.01616	0.00538	0.04085	0.02375	0.00141	0.00682	0.02103
53	Xibeh	0.04537	0.03317	0.00471	0.02153	0.02823	0.02372	0.02628	0.04584	0.06656	0.02975	0.03613	0.05411	0.01381	0.05712	0.03641	0.03311	0.02411	0.04566
Table S5. (continued)
		19	20	21	22	23	24	25	26	27	28	29	30	31	32	33	34	35	36
1	Koreana
2	Korean-Chinesea
3	Mongoliana
4	Manchuriana
5	Han (Beijing)a
6	Vietnamesea
7	Thaisa
8	Japaneseb
9	Han (Guangdong)c
10	Daurd
11	Ewenkid
12	Koreand
13	Mongold
14	Oroqend
15	Han (Zhanjiang)e
16	Han (Liaoning)e
17	Han (Qingdao)e
18	Han (Wuhan)e
19	Han (Xinjiang)e
20	Han (Yunnan)e	0.01872
21	Han (Yanbian)f	-0.00315	0.02923
22	BGg	0.05156	0.04708	0.07707
23	Bug	0.02472	0.01574	0.04558	0.02472
24	CLg	0.03519	0.01027	0.04596	0.06601	0.00479
25	CUg	0.03887	0.02119	0.04971	0.07404	0.01225	-0.00408
26	CXg	0.023	0.00583	0.02825	0.05958	-0.00189	-0.01335	0.00569
27	Dag	0.00739	0.01741	0.0153	0.04259	-0.00398	0.00602	0.0094	-0.0037
28	DGg	0.02958	0.02346	0.04047	0.07326	0.0134	-0.00568	0.00654	0.00952	0.00919
29	GLg	0.02063	0.02011	0.0285	0.05954	0.01719	0.01342	0.02446	-0.00471	0.00235	0.01821
30	HLg	0.0368	0.03199	0.04707	0.09183	0.02528	-3e-05	-0.00748	0.0165	0.01163	0.00336	0.02772
31	HSg	0.04001	0.02457	0.06935	0.03985	-0.00063	0.00802	0.01715	0.01406	0.01388	0.00912	0.02892	0.03023
32	JMg	0.08999	0.06293	0.11583	0.11757	0.04824	0.03696	0.04756	0.04181	0.05624	0.05878	0.07545	0.05597	0.03646
33	KNg	0.01538	0.00607	0.03217	0.04073	0.00778	0.00684	0.01318	-0.00362	0.00658	0.02503	0.02243	0.0275	0.01788	0.04671
34	LCg	0.04898	0.01354	0.06468	0.07325	0.00773	-0.00435	0.0099	0.00542	0.0229	0.00877	0.02064	0.02535	0.01371	0.05147	0.01359
35	LGg	0.00033	0.02074	0.01501	0.04026	0.00348	0.01223	0.00172	0.00462	-0.00835	0.01865	0.01367	0.01405	0.01186	0.05405	-0.00322	0.02763
36	LQg	0.02415	0.02031	0.03131	0.06429	0.01867	0.01677	0.03061	-0.00868	0.0067	0.02458	-0.00604	0.04105	0.04166	0.09726	0.02123	0.02949	0.0175
37	MKg	0.03766	0.01247	0.05397	0.04577	-0.00474	-0.00494	0.01434	-0.01219	0.00473	0.00778	0.00865	0.02799	-0.00031	0.04747	0.01079	0.00304	0.01537	-0.00115
38	MLg	0.01389	0.01155	0.03081	0.04564	0.00406	-0.00133	0.00845	-0.00771	-0.00126	0.00584	0.0113	0.0204	-0.00158	0.04863	0.00386	0.01906	-0.0032	0.00773
39	MNg	0.0752	0.03048	0.07607	0.10443	0.02428	0.00156	0.00627	0.01052	0.0292	0.02071	0.03871	0.01807	0.03701	0.06785	0.04038	0.01271	0.04383	0.03086
40	MOg	0.02181	0.03626	0.0463	0.05008	0.01513	0.02956	0.04058	0.03365	0.02257	0.00931	0.03713	0.04926	0.01842	0.09636	0.03934	0.04339	0.02128	0.03034
41	POg	0.0168	0.0236	0.03665	0.01219	-0.00254	0.02801	0.03581	0.01857	0.00177	0.02899	0.02538	0.04923	0.00428	0.06956	0.01703	0.03775	0.00312	0.02501
42	PYg	0.0431	0.03389	0.04888	0.09655	0.02869	0.01816	0.03262	-0.00104	0.01977	0.03347	-0.01055	0.05232	0.045	0.10307	0.03239	0.01646	0.03206	0.00432
43	RGg	0.01607	0.04218	0.02618	0.06315	0.03154	0.03019	0.05511	0.0318	0.01767	0.03112	0.03578	0.05415	0.06169	0.13147	0.03074	0.05886	0.02166	0.02669
44	TNg	0.05746	0.01977	0.05951	0.10001	0.02885	-0.00089	0.01492	0.00602	0.02738	0.00848	0.02211	0.03058	0.04005	0.08986	0.03455	-0.00424	0.03946	0.013
45	WSg	0.05353	0.03204	0.06772	0.0423	0.01155	0.01326	0.02389	0.02887	0.01782	0.01964	0.0493	0.02827	0.01025	0.03603	0.02861	0.0292	0.02468	0.04638
46	Hezheh	0.02446	0.04466	0.03377	0.0793	0.05887	0.07298	0.07215	0.05959	0.04186	0.06069	0.04451	0.073	0.07914	0.12316	0.06058	0.08294	0.04764	0.05789
47	Han (Harbin)h	0.00218	-0.00691	0.00865	0.06463	0.0231	0.01642	0.0182	0.02087	0.01393	0.01448	0.02752	0.02294	0.03183	0.0786	0.01327	0.02185	0.01124	0.0291
48	Han (Xinjiang)h	-0.00083	0.01664	0.0052	0.06329	0.02478	0.03345	0.01905	0.02653	0.00306	0.02703	0.0176	0.03098	0.03782	0.08859	0.01659	0.03912	-0.00347	0.0276
49	Koreanh	8e-05	0.02375	-0.00162	0.0832	0.04925	0.04525	0.0485	0.03865	0.0216	0.03913	0.03533	0.03985	0.07294	0.13189	0.03318	0.0653	0.01503	0.02734
50	Manchurianh	-0.00443	0.01454	-0.00023	0.04828	0.02547	0.02974	0.02222	0.01612	0.00276	0.03277	0.01136	0.03457	0.03974	0.08879	0.0101	0.0421	-0.00424	0.01845
51	Uygur (Urumqi)h	-0.00313	0.03753	0.00073	0.09347	0.05611	0.0532	0.03925	0.03943	0.02138	0.03588	0.02861	0.03452	0.06621	0.11245	0.03671	0.06466	0.01277	0.03253
52	Uygur (Yili)h	-0.00472	0.03261	-0.00026	0.07419	0.03076	0.03274	0.02999	0.02033	0.00454	0.02847	0.02156	0.02818	0.04908	0.09889	0.0201	0.05022	-0.00409	0.02938
53	Xibeh	0.02039	0.03294	0.01786	0.06639	0.04613	0.0532	0.05069	0.03478	0.02074	0.05989	0.02441	0.07103	0.06959	0.12627	0.03761	0.06392	0.01997	0.02569
Table S5. (continued)
		37	38	39	40	41	42	43	44	45	46	47	48	49	50	51	52	53
1	Koreana
2	Korean-Chinesea
3	Mongoliana
4	Manchuriana
5	Han (Beijing)a
6	Vietnamesea
7	Thaisa
8	Japaneseb
9	Han (Guangdong)c
10	Daurd
11	Ewenkid
12	Koreand
13	Mongold
14	Oroqend
15	Han (Zhanjiang)e
16	Han (Liaoning)e
17	Han (Qingdao)e
18	Han (Wuhan)e
19	Han (Xinjiang)e
20	Han (Yunnan)e
21	Han (Yanbian)f
22	BGg
23	Bug
24	CLg
25	CUg
26	CXg
27	Dag
28	DGg
29	GLg
30	HLg
31	HSg
32	JMg
33	KNg
34	LCg
35	LGg
36	LQg
37	MKg
38	MLg	-0.00545
39	MNg	0.00945	0.0248
40	MOg	0.019	0.00527	0.05595
41	POg	0.00792	-0.00019	0.05926	0.01426
42	PYg	0.01669	0.02669	0.03787	0.06037	0.05174
43	RGg	0.03714	0.02274	0.0782	0.01796	0.03835	0.06015
44	TNg	0.00964	0.02123	0.00055	0.04167	0.05349	0.013	0.05166
45	WSg	0.01345	0.01597	0.02228	0.02872	0.01567	0.07374	0.06056	0.04412
46	Hezheh	0.07709	0.0613	0.1041	0.0674	0.06074	0.06973	0.06384	0.08858	0.08584
47	Han (Harbin)h	0.0314	0.01833	0.03928	0.02782	0.02911	0.04436	0.03398	0.02697	0.03556	0.03591
48	Han (Xinjiang)h	0.03889	0.0182	0.05517	0.04474	0.02288	0.03361	0.05046	0.04967	0.0463	0.02731	-0.00137
49	Koreanh	0.05319	0.02904	0.06597	0.02705	0.04661	0.06659	0.01874	0.05555	0.06183	0.04695	0.00138	0.01535
50	Manchurianh	0.03743	0.01635	0.05757	0.04638	0.02173	0.02803	0.03398	0.04544	0.05001	0.02509	0.00383	-0.01372	0.01071
51	Uygur (Urumqi)h	0.06315	0.03338	0.07926	0.0475	0.05168	0.05367	0.03938	0.06098	0.07399	0.03055	0.01158	-0.00212	0.00208	-0.00287
52	Uygur (Yili)h	0.04378	0.01502	0.06535	0.0317	0.02874	0.04069	0.02551	0.04949	0.05888	0.03494	0.01354	0.00074	0.00416	-0.00298	-0.00136
53	Xibeh	0.04896	0.02977	0.07105	0.05882	0.03872	0.04188	0.0558	0.05946	0.0669	0.048	0.03473	0.00676	0.02043	-0.00076	0.023	0.01823
aPresent work; bMaruyama et al. [26]; cKivisild et al. [20]; dKong et al. [25]; eYao et al. [19]; fZhang et al. [28]; gLi et al. [36]; hPowell et al. [37]
