# Supplementary material for: The Peopling of Korea Revealed by Analyses of Mitochondrial DNA and Y-Chromosomal Markers
Source: PLoS One. 2009 Jan 16;4(1):e4210. doi: 10.1371/journal.pone.0004210 (PMC2615218; doi:10.1371/journal.pone.0004210)
Supplement: Table S6 — F ST distances of Y chromosome haplogroups in east Asian popoulations (non-significant values are underlined). aHong et al. [29]; bXue et al. [31]. (0.05 MB XLS) [file pone.0004210.s006.xls]

## Sheet: Y-Hong_Xue
Table S6. FST distances of Y chromosome haplogroups in east Asian popoulations (non-significant values are underlined)
		1	2	3	4	5	6	7	8	9	10	11	12	13	14	15	16	17	18	19
1	Han (Beijing)a
2	Manchuriana	0.04688
3	Japanesea	0.11972	0.07067
4	Koreana	0.02632	0.00571	0.08278
5	Buryatsa	0.1498	0.09876	0.15395	0.08508
6	Khalkhsa	0.13693	0.08203	0.15157	0.07941	0.00187
7	Han (Yunnan)a	0.01214	0.02327	0.09753	0.00082	0.08804	0.0945
8	Indonesiansa	0.06712	0.06489	0.11751	0.04352	0.14071	0.12574	0.04307
9	Philippinesa	0.01433	0.06503	0.15392	0.05036	0.20453	0.18473	0.02853	0.09627
10	Thaisa	0.16758	0.18218	0.19236	0.15771	0.22662	0.21838	0.15058	0.04428	0.20867
11	Vietnamesea	0.04331	0.00114	0.09722	0.00427	0.09185	0.07601	0.01272	0.02398	0.06095	0.12984
12	Daurb	0.0871	0.05931	0.12577	0.04509	0.0284	0.01599	0.0574	0.03935	0.14057	0.10931	0.03403
13	Ewenkib	0.17482	0.09852	0.19207	0.1077	0.05586	0.00488	0.14688	0.15759	0.21261	0.26777	0.08409	0.04279
14	Hezheb	0.06542	0.02685	0.13235	0.02198	0.03666	0.04562	0.0153	0.09734	0.08573	0.21252	0.01592	0.04172	0.06908
15	Huib	0.06917	0.07094	0.079	0.06132	0.06056	0.02951	0.06078	0.07806	0.1264	0.15687	0.0728	0.03037	0.08444	0.08178
16	Manchub	0.04501	0.01226	0.09651	0.00248	0.02754	0.02411	2e-05	0.06327	0.07077	0.17105	0.00125	0.01765	0.0557	-0.01565	0.03846
17	InnerMongolsb	0.12588	0.06221	0.16237	0.06973	0.01809	-0.00331	0.08687	0.13807	0.16434	0.24295	0.05227	0.03158	-0.00582	0.0158	0.06442	0.01262
18	Oroqenb	0.22382	0.14337	0.22294	0.13947	0.05719	0.01136	0.18926	0.20225	0.27896	0.29971	0.13701	0.05426	-0.00414	0.11274	0.10411	0.09047	0.02459
19	Uygur (Urumqi)b	0.14391	0.18792	0.19263	0.16685	0.18231	0.16305	0.13744	0.16735	0.20649	0.22253	0.19278	0.16492	0.26579	0.20853	0.05469	0.16344	0.21232	0.2905
20	Uygur (Yili)b	0.1263	0.14928	0.18507	0.13823	0.15822	0.13045	0.10829	0.1485	0.16861	0.22194	0.15299	0.14486	0.2176	0.16526	0.04828	0.12715	0.16649	0.24918	-0.01343
21	Xibeb	0.04886	0.03491	0.10452	0.0268	0.01143	0.0084	0.01957	0.07227	0.09069	0.17025	0.02839	0.01276	0.04867	0.00363	0.013	-0.0096	0.01007	0.08631	0.11217
22	Han (Harbin)b	0.03826	0.04782	0.16296	0.04646	0.17882	0.16799	0.02861	0.13106	0.0181	0.24082	0.03743	0.13789	0.1903	0.0404	0.14978	0.04203	0.12228	0.26005	0.26125
23	Han (Yili)b	0.01256	0.04127	0.10689	0.02618	0.13229	0.10399	0.00364	0.04716	0.01484	0.13957	0.03799	0.069	0.15416	0.06442	0.03558	0.02809	0.11196	0.19793	0.10228
24	Korean-Chineseb	0.01982	0.00223	0.09577	0.0028	0.12674	0.11846	0.00092	0.05545	0.04417	0.18476	-0.00349	0.0893	0.15231	0.03433	0.08415	0.01829	0.09525	0.21308	0.16743
25	Buyib	0.20184	0.21799	0.23698	0.17981	0.24435	0.25104	0.17044	0.06014	0.23952	0.01559	0.16298	0.12261	0.31008	0.22876	0.20601	0.20025	0.2755	0.33759	0.28647
26	Hanib	0.18173	0.1636	0.2024	0.14806	0.17057	0.17131	0.14198	0.04895	0.21672	0.02542	0.09683	0.07636	0.20388	0.15862	0.16061	0.13844	0.17891	0.25106	0.25401
27	Lib	0.27645	0.29905	0.28623	0.25386	0.32982	0.31708	0.27053	0.11825	0.30693	0.04097	0.24118	0.20085	0.36959	0.3293	0.26067	0.28867	0.35374	0.4109	0.34292
28	Qiangb	0.02003	0.06793	0.05795	0.04861	0.15167	0.13759	0.02896	0.03596	0.04221	0.09521	0.05413	0.07615	0.18452	0.09756	0.03995	0.05875	0.14873	0.23714	0.12219
29	Sheb	0.05942	0.11333	0.1828	0.07532	0.21023	0.19581	0.07284	0.08679	0.07763	0.18549	0.11239	0.10385	0.24273	0.1346	0.13425	0.10834	0.2044	0.26949	0.25511
30	Tibetansb	0.12562	0.13601	0.05478	0.12203	0.21922	0.22553	0.09768	0.17604	0.13383	0.25708	0.14089	0.20296	0.28833	0.15569	0.13253	0.12911	0.22408	0.34023	0.22244
31	Yao (Bama)b	0.10019	0.08121	0.15024	0.06813	0.15363	0.13232	0.06826	0.12853	0.11353	0.18365	0.05797	0.11309	0.17009	0.0856	0.11778	0.04434	0.12239	0.20451	0.23633
32	Yao (Liannan)b	0.13655	0.1863	0.24485	0.13597	0.26684	0.25642	0.14622	0.15796	0.17525	0.25007	0.19254	0.15765	0.32131	0.20955	0.19772	0.18301	0.27431	0.32287	0.32114
33	Han (Chengdu)b	0.01885	0.04079	0.12039	0.02232	0.12449	0.10755	0.0147	0.01971	0.02451	0.10544	0.01913	0.03473	0.1315	0.04744	0.07094	0.02591	0.10234	0.18249	0.19239
34	Han (Lanzhou)b	0.00914	0.01415	0.07333	0.0077	0.05059	0.03444	0.00083	0.04158	0.04295	0.13637	0.00744	0.01101	0.06866	0.01046	0.00162	-0.00951	0.0317	0.11269	0.10537
35	Han (Meixian)b	0.05785	0.09332	0.15176	0.05427	0.14581	0.12509	0.05759	0.08235	0.08808	0.16952	0.09607	0.06449	0.17929	0.10717	0.07316	0.06356	0.15126	0.19191	0.19596
36	Japaneseb	0.10284	0.03976	-0.00646	0.06334	0.13072	0.13332	0.07149	0.0968	0.13473	0.17264	0.06727	0.10491	0.17568	0.09975	0.07579	0.07082	0.13708	0.21585	0.18556
37	Koreanb	0.04031	-0.00926	0.08115	0.00922	0.11585	0.10554	0.01251	0.06753	0.05248	0.19108	-0.00086	0.08707	0.12848	0.0286	0.08557	0.01662	0.07982	0.18817	0.18007
38	OuterMongoliab	0.19882	0.12916	0.20079	0.132	0.03622	-0.0046	0.1604	0.18471	0.24751	0.27731	0.12314	0.05978	0.00452	0.09519	0.06608	0.07571	0.01178	0.00928	0.20149
Table S6. (continued)
		20	21	22	23	24	25	26	27	28	29	30	31	32	33	34	35	36	37	38
1	Han (Beijing)a
2	Manchuriana
3	Japanesea
4	Koreana
5	Buryatsa
6	Khalkhsa
7	Han (Yunnan)a
8	Indonesiansa
9	Philippinesa
10	Thaisa
11	Vietnamesea
12	Daurb
13	Ewenkib
14	Hezheb
15	Huib
16	Manchub
17	InnerMongolsb
18	Oroqenb
19	Uygur (Urumqi)b
20	Uygur (Yili)b
21	Xibeb	0.08699
22	Han (Harbin)b	0.21114	0.08143
23	Han (Yili)b	0.07199	0.04129	0.05021
24	Korean-Chineseb	0.13183	0.0387	0.02872	0.0364
25	Buyib	0.27847	0.20066	0.2808	0.17892	0.23659
26	Hanib	0.23339	0.13373	0.22359	0.16211	0.17356	0.02836
27	Lib	0.34154	0.27329	0.37706	0.25748	0.31824	0.06923	0.08663
28	Qiangb	0.11676	0.05871	0.08624	0.00877	0.05631	0.13924	0.12626	0.19048
29	Sheb	0.23484	0.12912	0.13366	0.05349	0.14285	0.17292	0.21959	0.29328	0.07346
30	Tibetansb	0.2032	0.14235	0.1438	0.1107	0.12617	0.30246	0.26372	0.38231	0.05937	0.22381
31	Yao (Bama)b	0.20191	0.09214	0.07094	0.06454	0.07345	0.26164	0.20013	0.32195	0.09774	0.18734	0.17865
32	Yao (Liannan)b	0.30219	0.20442	0.23337	0.12974	0.23602	0.22403	0.29467	0.37679	0.16011	-8e-05	0.31003	0.27352
33	Han (Chengdu)b	0.16476	0.04427	0.04824	0.0081	0.05252	0.11623	0.10573	0.19877	0.01533	0.01564	0.14856	0.08642	0.09338
34	Han (Lanzhou)b	0.08051	-0.01452	0.04703	0.00245	0.01938	0.16941	0.11845	0.24796	0.01117	0.07655	0.10001	0.07249	0.15377	0.00574
35	Han (Meixian)b	0.18318	0.08178	0.1325	0.02863	0.12011	0.18931	0.21128	0.27086	0.0593	0.01077	0.20821	0.11211	0.05562	0.02046	0.0492
36	Japaneseb	0.17126	0.0795	0.13352	0.0903	0.06655	0.21764	0.17149	0.28364	0.05123	0.17486	0.0573	0.13143	0.24729	0.09794	0.05357	0.14689
37	Koreanb	0.13945	0.0386	0.03155	0.04284	-0.02389	0.23555	0.16983	0.3115	0.06525	0.14556	0.11797	0.07725	0.23224	0.05479	0.02126	0.12466	0.04828
38	OuterMongoliab	0.16011	0.05065	0.22897	0.16634	0.1731	0.31686	0.21999	0.37487	0.20606	0.27496	0.28605	0.19206	0.33242	0.17761	0.08485	0.2043	0.18715	0.1537
aHong et al. [29]; bXue et al. [31].
